# Supplementary material for: High-throughput screening identifies histone deacetylase inhibitors that modulate GTF2I expression in 7q11.23 microduplication autism spectrum disorder patient-derived cortical neurons
Source: PubMed Central journal article supplement (PMC7677843; doi:10.1186/s13229-020-00387-6), 2020-11-19

A

Chr.7

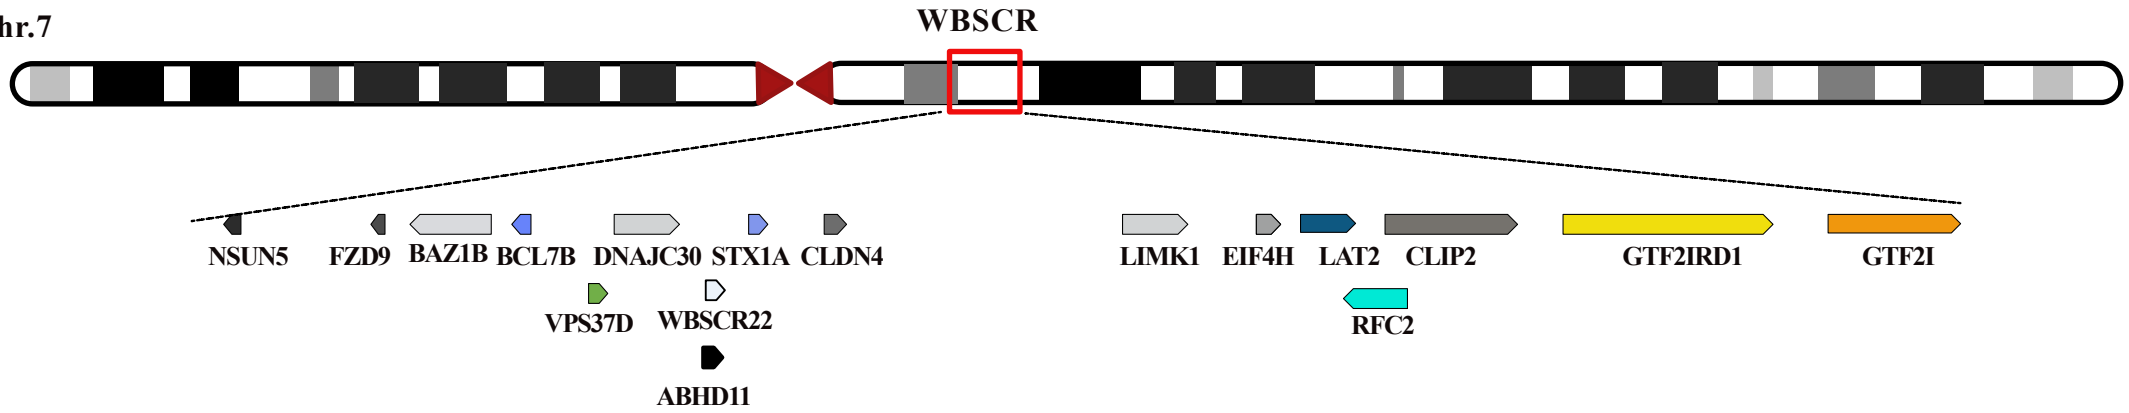

B

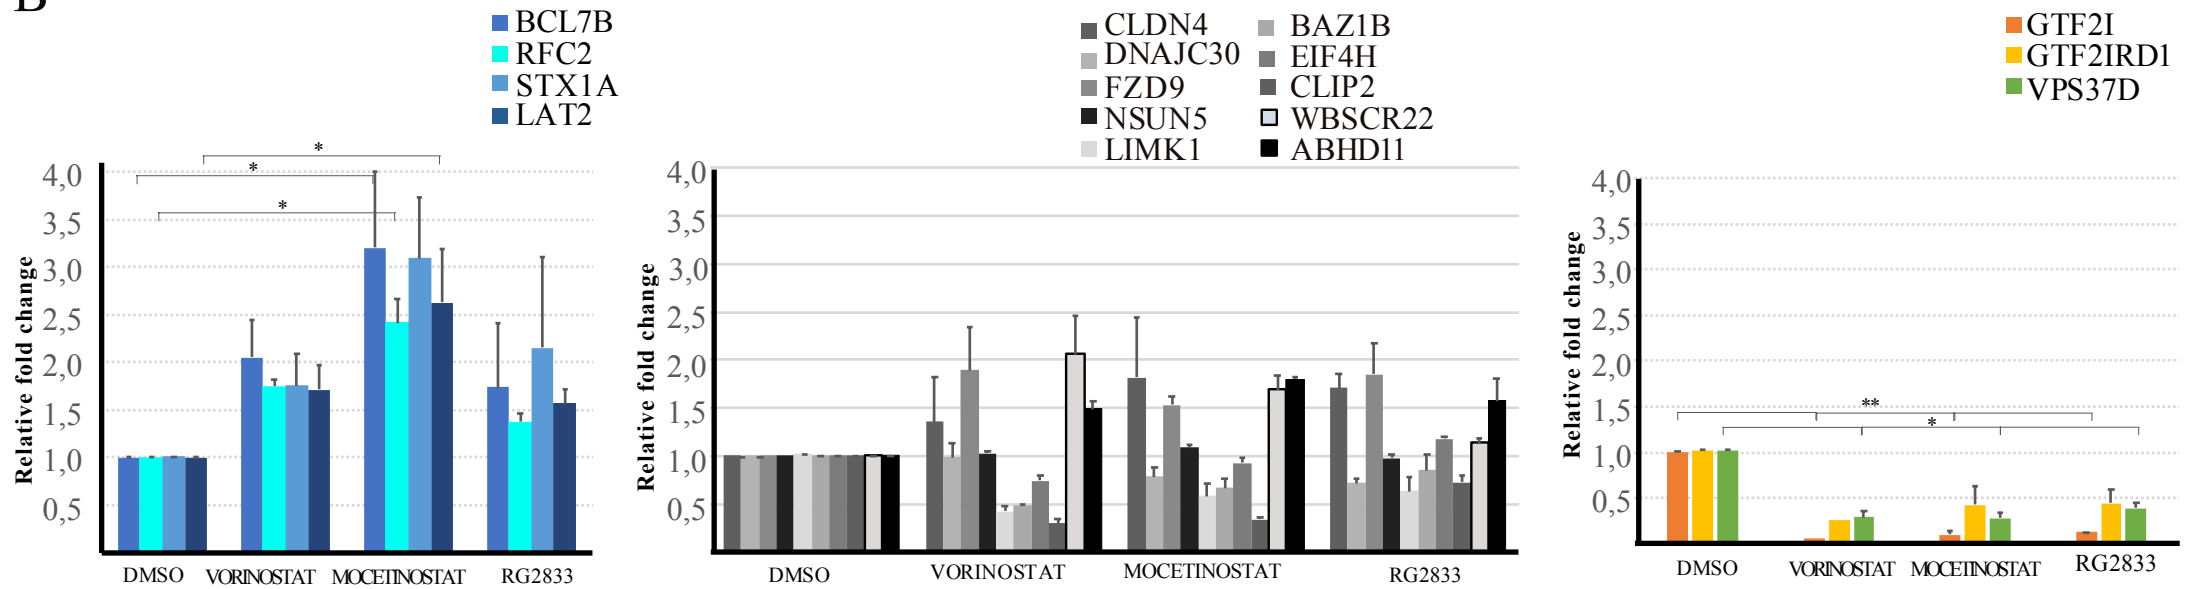

Supplement: 13229_2020_387_MOESM3_ESM.pdf [file 13229_2020_387_MOESM3_ESM.pdf]
